# Supplementary material
Source: PubMed Central journal article supplement (PMC5758405)

1 **SUPPLEMENTARY ONLINE REPOSITORY**

2

3 **ATF6 $\alpha$  regulates airway hyperreactivity, smooth muscle proliferation, and contractility**

4

5 Hirotooshi Unno MD PhD<sup>a</sup>, Marina Miller, MD, PhD<sup>a</sup>, Peter Rosenthal, BS<sup>a</sup>, Andrew Beppu, BS<sup>a</sup>,

6 Sudipta Das, PhD<sup>a</sup>, David H. Broide, MB. Ch.B.<sup>a</sup>

7

8 <sup>a</sup>Department of Medicine, University of California San Diego, La Jolla, California

9

10

11 Corresponding author:

12 David Broide, MB ChB.,

13 University of California San Diego

14 9500 Gilman Drive, MC 0635

15 La Jolla, CA 92093-0635

16

17 Fax: (858) 534-2110

18 Email: [dbroide@ucsd.edu](mailto:dbroide@ucsd.edu)

19

20

21

22

23

24 **SUPPLEMENTARY METHODS**

25 **Mouse model of house dust mite (HDM) induced asthma**

26 ATF6 $\alpha$  deficient mice (kindly provided by Dr Mori)<sup>E1</sup> on a C57Bl6 background and WT control  
27 C57Bl6 mice aged approximately 12 weeks were either challenged with HDM (Greer)(HDM  
28 group)(n=8 mice/ group), or not challenged with HDM (no HDM group) (n=8 mice/ group) as  
29 previously described<sup>E2</sup>. The HDM used in this study contains 1,145  $\mu$ g Der p 1 per 25 ml vial  
30 (Greer product certification of analysis sheet). In brief in the HDM group, ATF6 $\alpha$  deficient or  
31 WT mice were intranasally administered 100  $\mu$ g HDM in 50  $\mu$ l PBS on day 0, 7, 14, and 21. On  
32 day 24, AHR was measured, mice were sacrificed and bronchoalveolar lavage (BAL) fluid and  
33 lungs collected to quantitate levels of airway inflammation and airway remodeling as described  
34 below. All experimental mouse protocols were approved by the UCSD Institutional Animal Care  
35 and Use Committee.

36

37 **Measurement of airway hyperresponsiveness**

38 Airway responsiveness to methacholine was assessed in intubated and ventilated mice aged 12  
39 wk ( $n = 8$  mice/group) (flexiVent ventilator; Scireq) using Scireq software on day 24 of the  
40 HDM mouse protocol. Mice were anesthetized with ketamine (100 mg/kg) and xylazine (10  
41 mg/kg) i.p. and exposed to nebulized PBS and methacholine (0, 3, 24, and 48 mg/ml) as  
42 previously described<sup>E3</sup>. The following ventilator settings were used: tidal volume (10 ml/kg),  
43 frequency (150/min), and positive end-expiratory pressure (3 cmH<sub>2</sub>O).

44

45

46

47 **Lung processing**

48 Lungs were processed for immunohistology (paraffin-embedded lung sections) as previously  
49 described in this laboratory<sup>E3,E4</sup>. In brief, lungs were equivalently inflated with an intratracheal  
50 injection of the same volume of 4% paraformaldehyde solution (Sigma Chemicals, St. Louis,  
51 MO) to preserve the pulmonary architecture.

52

53 **Assessment of thickness of airway smooth muscle layer**

54 The thickness of the airway smooth muscle layer was measured by  $\alpha$ -smooth actin  
55 immunohistochemistry as previously described<sup>E3,E4</sup>. Lung sections were immunostained with an  
56 anti-mouse  $\alpha$ -smooth muscle actin Ab to detect peribronchial smooth muscle. The area of  
57 peribronchial  $\alpha$ -smooth muscle actin staining in paraffin-embedded lungs was outlined and  
58 quantified under a light microscope (Leica DMLS, Leica Micro systems) attached to image  
59 analysis system (image-Pro plus, Media Cybernetics, Bethesda MD) as previously described<sup>E3,E4</sup>.  
60 Results are expressed as the area of peribronchial  $\alpha$ -smooth actin staining per micrometer length  
61 of basement membrane of bronchioles 150-200  $\mu$ m internal diameter.

62

63 **Assessment of peribronchial fibrosis**

64 The area of peribronchial trichrome staining in paraffin-embedded lungs was outlined and  
65 quantified under a light microscope attached to image analysis system as previously  
66 described<sup>E3,E4</sup>. Results are expressed as the area of peribronchial trichrome staining per  
67 micrometer length of basement membrane of bronchioles 150-200  $\mu$ m internal diameter.

68

69

70 **Airway mucus expression.**

71 To quantitate the level of mucus expression in the airway, the number of periodic acid-Schiff  
72 (PAS)<sup>+</sup> cells in similar sized individual bronchioles was counted as previously described<sup>E3,E4</sup>.  
73 Results are expressed as the number of PAS<sup>+</sup> cells per bronchiole.

74

75 **Assessment of airway inflammation**

76 *BAL cell counts.* BAL fluid was collected by lavaging the lung with 1 ml PBS via a tracheal  
77 catheter as previously described<sup>E3,E4</sup>. BAL total and differential cell counts were quantified in  
78 Wright Giemsa stained slides.

79

80 *Peribronchial lung eosinophils, neutrophils, macrophages and lymphocytes.*

81 Levels of lung eosinophils, neutrophils, CD4+ lymphocytes, and F4/80 positive macrophages  
82 were quantitated in the peribronchial space in lung sections processed for immunohistochemistry  
83 using an anti-mouse MBP Ab (rabbit polyclonal Ab kindly provided by James Lee PhD, Mayo  
84 Clinic, Scottsdale, Arizona), an anti-mouse neutrophil elastase Ab (rat monoclonal Ab SC-  
85 71674, Santa Cruz, Dallas, Tx), an anti-mouse CD4 Ab (rat monoclonal Ab, GTX85525,  
86 GeneTex), and an anti-mouse F4/80 Ab (rat monoclonal Ab, SC-52664 Santa Cruz  
87 Biotechnology) as previously described<sup>E3,E4</sup>. The number of individual cells staining positive in  
88 the peribronchial space was counted using a light microscope. Results are expressed as the  
89 number of peribronchial cells staining positive per bronchiole with 150–200 μm of internal  
90 diameter. At least five bronchioles were counted in each slide.

91

92

93 **BAL cytokines**

94 Levels of IL-5 (R&D Systems, Minneapolis, MN), IL-13 (R&D Systems, Minneapolis, MN),  
95 and TGF- $\beta$ 1 (R&D Systems, Minneapolis, MN) were quantitated by Elisa in BAL fluid obtained  
96 from WT and ATF6 $\alpha$  deficient mice.

97

98 **Mouse airway smooth muscle (mASM) cell culture**

99 Mouse airway smooth muscle was obtained from WT and ATF6 $\alpha$  deficient mice as previously  
100 described<sup>E5</sup>. In brief, after mouse sacrifice, the tracheas were excised, cut longitudinally with a  
101 scalpel to expose the lumen and then transferred to 0.14% Pronase (Roche Applied Science) in  
102 Ham's F-12 nutrient medium and incubated at 4°C overnight. The tracheas were then brushed  
103 with a cotton swab to remove the remaining adherent epithelial cells, cut into small pieces (~30  
104 per trachea), and cultured in DMEM/F-12 and 10% FBS for attachment and outgrowth. Four  
105 days later, smooth muscle cell outgrowth was apparent, and the cells were left to multiply for 2  
106 more days, after which they were trypsinized and plated into a 175-cm<sup>2</sup> flask. Confluency was  
107 reached within about 3-5 days. Experiments were done on the second passage, which was split  
108 1:2 from the first passage.

109

110 **Human airway smooth muscle (hASM) culture and transfection with ATF6 $\alpha$  siRNA**

111 Primary hASM were obtained from ScienCell (Carlsbad, CA)<sup>E6</sup>. hASM were maintained and  
112 cultured in flasks or plates (6, 24 and 96 well) using smooth muscle cell media with smooth  
113 muscle growth supplement (ScienCell) and 2% fetal bovine serum. hASM were transfected with  
114 either control siRNA or ATF6 $\alpha$  siRNA (100nM) by using transfection reagents siTran1.0  
115 (OROGENE) and Opti-MEM (Thermo Fisher Scientific) according the manufacturer's

116 instructions. The transfected hASM cells were used 48 hrs after the transfection in all  
117 experiments. We assessed the efficiency of ATF6 $\alpha$  gene knockdown by qRT-PCR as previously  
118 described in this laboratory<sup>E3,E4</sup>. In brief, total RNA was extracted with RNA-STAT-60 (Tel-  
119 Test) and reverse transcribed with Oligo-dT and SuperScript II kit (Life Technologies). qRT-  
120 PCR was performed with TaqMan PCR Master Mix and ATF6 $\alpha$  primers (all from Life  
121 Technology). The relative amounts of transcripts were normalized to those of housekeeping gene  
122 (GAPDH) mRNA and compared between control siRNA transfected samples and ATF6 $\alpha$  siRNA  
123 transfected samples by the  $\Delta\Delta$  cycle threshold method as previously described in this  
124 laboratory<sup>E3,E4</sup>. In addition, we quantitated levels of ATF6 $\alpha$  protein in hASM cells transfected  
125 with either control siRNA or ATF6 $\alpha$  siRNA by western blot as previously described in this  
126 laboratory<sup>E4</sup>. In brief, proteins were separated on a SDS/PAGE gel and transferred to a PVDF  
127 membrane. Membranes were blocked in 5% (wt/vol) milk in 1x Tris-buffered saline with Tween  
128 for 1 h and then incubated with primary antibody overnight at 4 °C. The primary antibodies used  
129 in this study were mouse monoclonal anti-ATF6 $\alpha$  (Abcam), and rabbit monoclonal anti-GAPDH  
130 (Genetex).

131

### 132 **Eotaxin-1**

133 Levels of eotaxin-1 were quantitated by ELISA (R&D Systems, Minneapolis, MN) in the  
134 supernatants of hASM transfected with either control siRNA or ATF6 $\alpha$  siRNA and stimulated  
135 with IL-13 (100 ng/ml) for 24 hrs.

136

137

138

139 **mASM and hASM contraction assay**

140 Either mouse ASM (WT vs ATF6 $\alpha$  deficient) or human ASM (control vs ATF6 $\alpha$  siRNA  
141 transfected) were used in an in vitro smooth muscle gel contraction assay as previously described  
142 in this laboratory<sup>E7</sup>. ASM (2x10<sup>5</sup> cells/well) were cultured in basal medium without growth  
143 factors for 24 hours before seeding in collagen gels free of LPS (Advanced BioMatrix, San  
144 Diego, Calif). After overnight incubation in collagen gels, ASM cells were cultured in the  
145 presence or absence of either diluent (control), methacholine (100  $\mu$ M) or histamine (200  $\mu$ M)  
146 for varying time periods (0, 15, and 30 min). With agonist-induced ASM contraction, the area of  
147 the gel decreases significantly, as described in studies of ASM<sup>E7</sup>. The area of the gels was  
148 quantitated by using a Bio-Rad ImageDR transilluminator and Versadoc scanner (Bio-Rad  
149 Laboratories, Hercules, Calif) with an accompanying image-capture and analysis program to  
150 generate the area in square millimeters. Results are expressed as % contraction, which compares  
151 the area of the gel at the time point studied to the area of the gel at baseline (0 min).

152

153 **mASM and hASM Proliferation**

154 mASM and hASM proliferation was assessed by BrdU incorporation using a BrdU ELISA  
155 (Exalpha Biological). BrdU incorporation in either mouse ASM (WT vs ATF6 $\alpha$  deficient) or  
156 human ASM (control vs ATF6 $\alpha$  siRNA transfected) was assessed in ASM (2x10<sup>4</sup> cells/well)  
157 stimulated to proliferate with either 2% FBS (low concentration) or 10% FBS (high  
158 concentration), or as a control no FBS in a 96-well microplate. BrdU was added 24hrs after  
159 incubating ASM with FBS, and 24hrs later BrdU incorporation was quantitated according to the  
160 manufacturer's instructions.

161

162 **mASM and hASM apoptosis.**

163 We used a Caspase-Glo 3/7 apoptosis assay (Promega) to detect caspase-3/7 activity in either  
164 mouse ASM (WT vs ATF6 $\alpha$  deficient) or human ASM (control vs ATF6 $\alpha$  siRNA transfected).  
165 In these experiments ASM cells ( $2 \times 10^4$  cells/well) were incubated with either 0% FBS, 2% FBS,  
166 or 10% FBS in 96-well microplate. The Caspase-Glo 3/7 apoptosis assay utilizes a luminogenic  
167 caspase-3/7 substrate, which contains the tetrapeptide sequence DEVD to detect caspase-3/7  
168 activity. Incubation of ASM with 1 $\mu$ M staurosporine a known inducer of apoptosis was used as a  
169 positive control. Staurosporine was added 24hrs after incubating ASM with FBS, and 24hrs later  
170 caspase-3/7 activity was quantitated according to the manufacturer's instructions.

171

172 **Statistical analysis**

173 All results are presented as mean  $\pm$  SEM. A statistical software package (Graph Pad Prism, San  
174 Diego, CA) was used for the analysis. A t test was used for analysis of two groups. ANOVA  
175 analysis was use when more than two groups were compared. P values of  $< 0.05$  were considered  
176 statistically significant.

177

178

179

180

181

182

183

184



185 **SUPPLEMENTARY DISCUSSION**

186 Our in vivo studies used global ATF6 $\alpha$ <sup>-/-</sup> mice, and thus we are not able to determine whether a  
187 deficiency of ATF6 $\alpha$  in ASM, or in cell types other than ASM, could have influenced ASM  
188 contraction in vivo. It is possible that ATF6 $\alpha$ <sup>-/-</sup> mice have a developmental defect in ASM,  
189 although baseline levels of ASM in WT and ATF6 $\alpha$ <sup>-/-</sup> mice are similar. The increase in ASM  
190 mass noted in this study in WT mice with four HDM challenges in vivo over a 3 week period  
191 may either be due to ASM hypertrophy and/or ASM proliferation and requires further study.  
192 Although our in vitro studies demonstrate that ATF6 $\alpha$  is required for methacholine or histamine  
193 induced ASM proliferation in vitro, further studies are needed to determine the role of ATF6 $\alpha$  in  
194 ASM proliferation induced by other important stimuli in asthma including leukotrienes and  
195 HDM. In this study we only performed experiments on ASM and thus we are not able to state  
196 whether ATF6 $\alpha$  regulates the function of other lung structural cells such as fibroblasts or  
197 myofibroblasts. Further human studies are also needed to determine whether ORMDL3 regulates  
198 ATF6 $\alpha$  in human ASM as it does in human bronchial epithelial cells<sup>4</sup>.

199

200 In addition to our studies of the ER demonstrating that ORMDL3 regulates ATF6 $\alpha$  in mouse and  
201 human lung cells<sup>E3,E4</sup>, previous studies have demonstrated that the ER resident protein 57  
202 (ERp57) is upregulated in allergen challenged mouse and human lung epithelial cells<sup>E8</sup>. Studies  
203 of HDM challenged mice selectively deficient in ERp57 in epithelial cells demonstrated reduced  
204 airway inflammation (in particular neutrophils and lymphocytes), fibrosis, and AHR<sup>E9</sup>.  
205 Interestingly, in epithelial cells in vitro, ATF6 $\alpha$  knockdown decreased HDM induced  
206 upregulation of ERp57 and decreased apoptosis<sup>E8</sup>. In contrast, ATF6 $\alpha$  does not regulate levels of  
207 apoptosis in ASM, suggesting that the ATF6 $\alpha$  pathway to ERp57 differs in functional outcomes

208 in epithelial cells and ASM. As ATF6 $\alpha$  is a transcription factor that regulates expression of at  
209 least 60 genes<sup>E1</sup>, further study is needed to determine which downstream pathway from ATF6 $\alpha$   
210 in ASM is important to ASM contractility. One candidate pathway downstream of ATF6 $\alpha$  is  
211 sarco/endoplasmic reticulum Ca<sup>2+</sup> ATPase 2b (SERCA2b) which like ORMDL3 and ATF6 $\alpha$  is  
212 also localized in the ER. We have previously demonstrated that in vitro and in vivo, increased  
213 expression of ORMDL3 leads to increased activation of ATF6 $\alpha$  and increased expression of  
214 SERCA2b<sup>E3,E4</sup>. In addition, knockdown of ATF6 $\alpha$  reduces levels of SERCA2b expression<sup>E3,E4</sup>.  
215 Thus, further study is needed to determine whether SERCA2b or other downstream pathways in  
216 ASM mediate the effect of ATF6 $\alpha$  on ASM contractility.

217

218

219

220

221

222

223

224

225

226

227

228

229

230

231 **SUPPLEMENTARY FIGURE LEGENDS:**

232

233 **Supplementary Figure E1. No difference in airway inflammation in ATF6 $\alpha$ <sup>-/-</sup> vs WT mice.**

234 ATF6 $\alpha$ <sup>-/-</sup> or WT mice (n = 8 mice/group) were challenged with HDM intranasally on day 0, 7, 14,  
235 21. On day 24, levels of BAL cellular inflammation was quantitated, and lung tissues were  
236 processed for immunohistology and image analysis. The number of Wright-Giemsa stained **A**,  
237 BAL eosinophils, **B**, BAL lymphocytes, **C**, BAL neutrophils, and **D**, BAL macrophages were  
238 quantitated by light microscopy. **E**, The number of peribronchiole MBP<sup>+</sup> eosinophils, **F**, CD4<sup>+</sup>  
239 lymphocytes, **G**, neutrophil elastase<sup>+</sup> (NE<sup>+</sup>) neutrophils, and **H**, F4/80<sup>+</sup> macrophages per  
240 bronchiole of 150-200 $\mu$ m internal diameter was quantitated by immunohistochemistry and image  
241 analysis. Levels of BAL **I**, IL-5, **J**, IL-13, and **K**, TGF $\beta$ 1 were quantitated by ELISA. **L**, Levels  
242 of eotaxin-1 were quantitated by ELISA in the supernatants of hASM stimulated with IL-13. \**P*  
243 <0.05, \*\*\**P* <0.001, and NS (not significant).

244

245 **Supplementary Figure E2. Comparison of ASM contraction in non-siRNA treated hASM**  
246 **cells and control siRNA treated hASM cells in vitro.**

247 Levels of smooth muscle contraction in non-siRNA treated hASM cells and control siRNA  
248 treated hASM cells were assessed at baseline (time 0 min), as well as 15 and 30 min after  
249 incubation with either **A**, methacholine, or **B**, histamine using an in vitro smooth muscle gel  
250 contraction assay. \**P* <0.05, \*\*\**P* <0.001 and NS (not significant).

251

252

253

254 **SUPPLEMENTARY REFERENCES**

255

256 E1. Adachi Y, Yamamoto K, Okada T, Yoshida H, Harada A, Mori K. ATF6 is a  
257 transcription factor specializing in the regulation of quality control proteins in the  
258 endoplasmic reticulum. *Cell Struct Funct* 2008; 33:75-89.

259

260 E2. Doherty TA, Soroosh P, Khorram N, Fukuyama S, Rosenthal P, Cho JY, et al. The tumor  
261 necrosis factor family member LIGHT is a target for asthmatic airway remodeling. *Nat*  
262 *Med.* 2011;17:596-603.

263

264 E3. Miller M, Rosenthal P, Beppu A, Mueller JL, Hoffman HM, Tam AB, et al. ORMDL3  
265 transgenic mice have increased airway remodeling and airway responsiveness  
266 characteristic of asthma. *J Immunol* 2014; 192:3475-87.

267

268 E4. Miller M, Tam AB, Cho JY, Doherty TA, Pham A, Khorram N, et al. ORMDL3 is an  
269 inducible lung epithelial gene regulating metalloproteases, chemokines, OAS, and ATF6.  
270 *Proc Natl Acad Sci U S A* 2012; 109:16648-53.

271

272 E5. Lauer M, Mukhopadhyay D, Fulop C, De la Motte C, Majors A, Hacall V. Primary  
273 Murine Airway Smooth Muscle Cells Exposed to Poly(I,C) or Tunicamycin Synthesize a  
274 Leukocyte-adhesive Hyaluronan Matrix. *J Biol Chem* 2009; 284:5299-312

275

- 276 E6. Xu W, Hong W, Shao Y, Ning Y, Cai Z, Li Q. Nogo-B regulates migration and contraction  
277 of airway smooth muscle cells by decreasing ARPC 2/3 and increasing MYL-9  
278 expression. *Respir Res.* 2011; 12: 14.  
279
- 280 E7. Miller M, Beppu A, Rosenthal P, Pham A, Das S, Karta M, et al. Fstl1 promotes asthmatic  
281 airway remodeling by inducing oncostatin M. *J Immunol* 2015; 95:3546-56.  
282
- 283 E8. Hoffman SM, Tully JE, Nolin JD, Lahue KG, Goldman DH, Daphtary N, et al.  
284 Endoplasmic reticulum stress mediates house dust mite-induced airway epithelial  
285 apoptosis and fibrosis. *Respir Res* 2013; 14:141.  
286
- 287 E9. Hoffman SM, Chapman DG, Lahue KG, Cahoon JM, Rattu GK, Daphtary N, et al.  
288 Protein disulfide isomerase-endoplasmic reticulum resident protein 57 regulates allergen-  
289 induced airways inflammation, fibrosis, and hyperresponsiveness. *J Allergy Clin*  
290 *Immunol* 2016; 137:822-32.  
291  
292

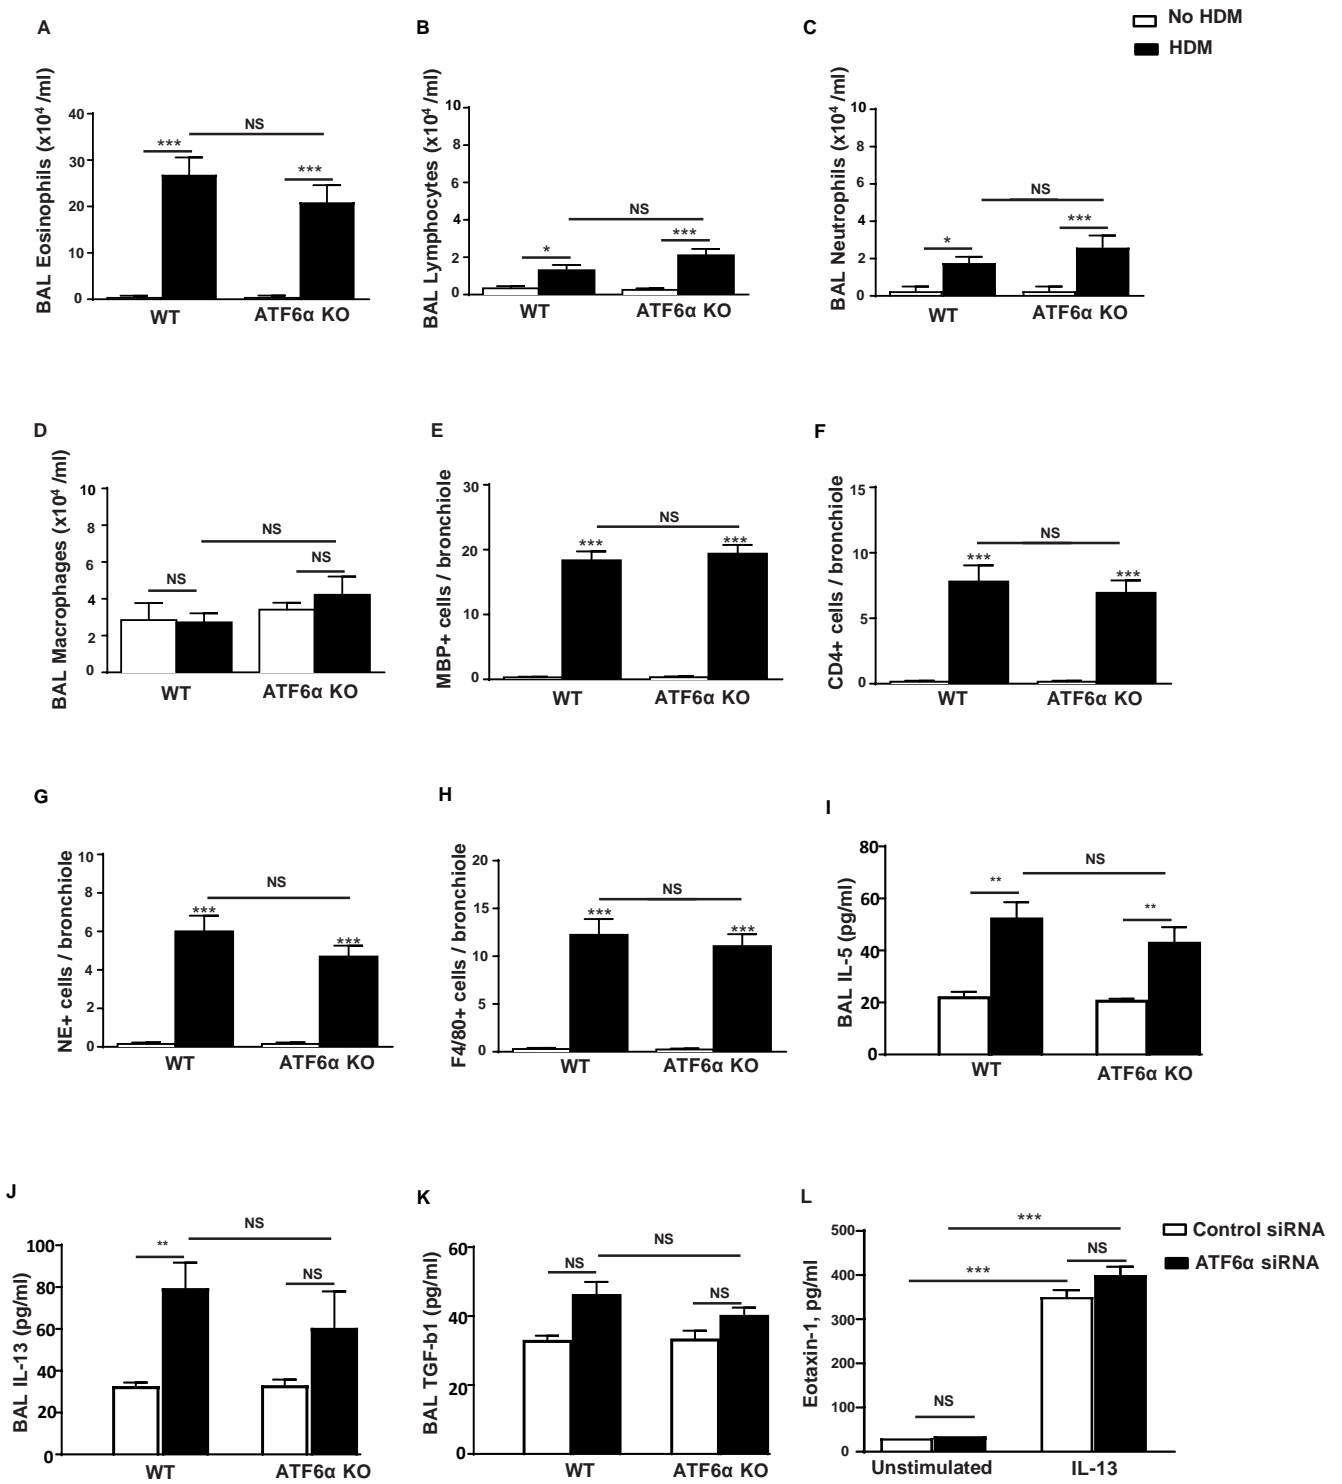

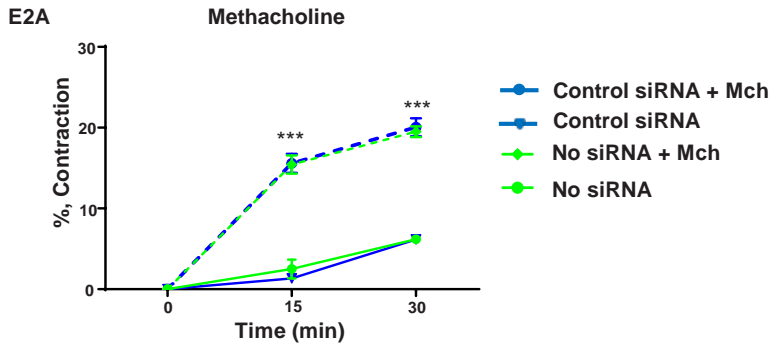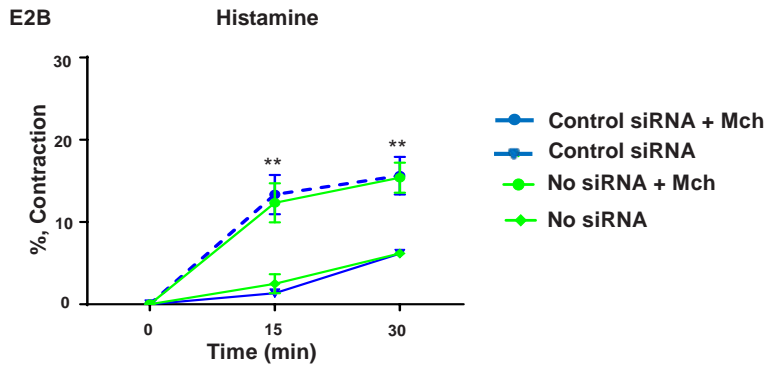

Supplement: NIHMS908745-supplement-supplement_1.pdf [file NIHMS908745-supplement-supplement_1.pdf]
